# Supplementary material for: First steps towards dissolution of NaSO4? by water
Source: Royal Society of Chemistry journal article supplement (doi:10.1039/b609941f), 2006-01-01

## Supplementary Information

193 nm photoelectron spectrum of  $(\text{NaSO}_4)_2^{2-}(\text{H}_2\text{O})_1$

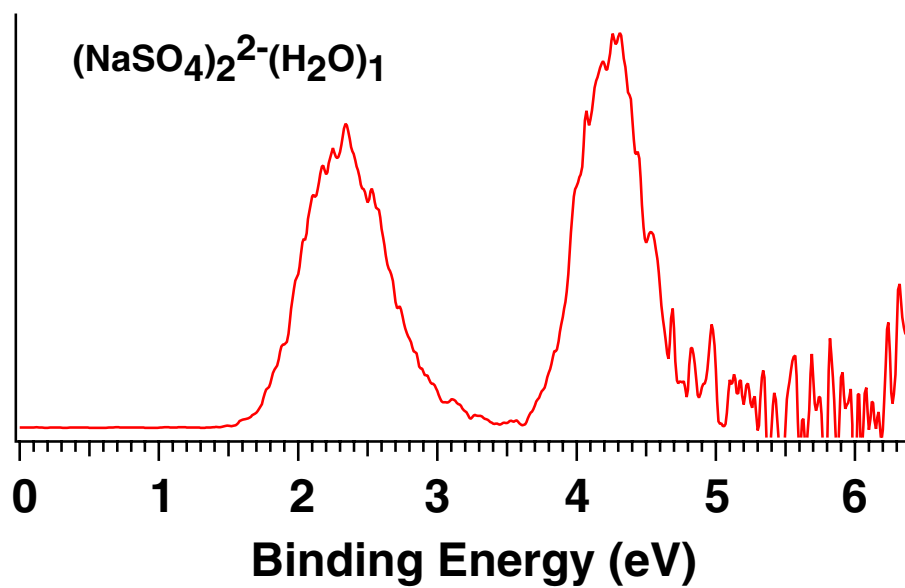

Comparison among 193 nm photoelectron spectra of  $\text{NaSO}_4^-(\text{H}_2\text{O})_4$  ( $m/z = 191$ ),  $\text{SO}_4^{2-}(\text{H}_2\text{O})_{16}$  ( $m/z = 192$ ), and an unidentified impurity ( $m/z = 190$ ), showing negligible contribution from the latter two to the X band assigned for  $\text{NaSO}_4^-(\text{H}_2\text{O})_4$ .

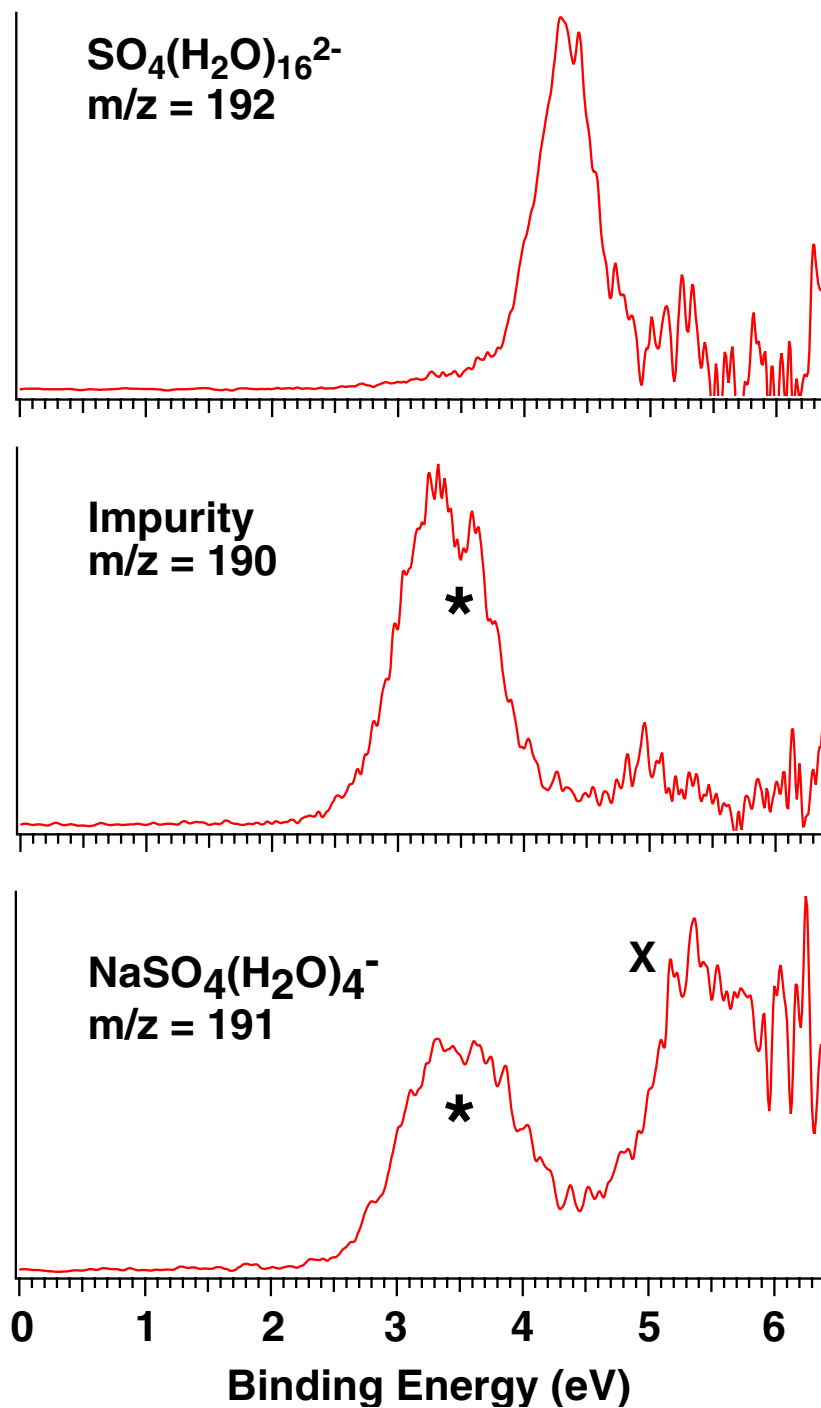

Supplement: b609941f.pdf [file b609941f.pdf]
